# Supplementary material
Source: Springer Nature journal article supplement (https://www.springermedizin.de/resource/supplementary/13075_2012_4437_MOESM6_ESM.pdf/10110406)
Supplement: MOESM6 [file 10110406]

# 1) Innate immunity

$Tlr3 > Trif$   
 $Mda5 > Mavs$   
 $Ngf > p75NTR$   
 $Tlr4/Ly96/Cd14$

$Traf3 > Irf3 > Stat1$   
 $Traf6 \left\{ \begin{array}{l} NF-\kappa B \\ Mapk8 \end{array} \right.$

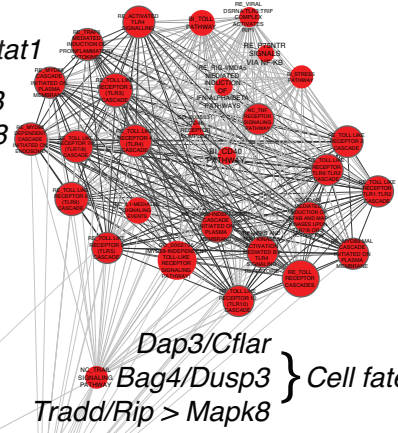

Aspects of autophagy

Regulation of epithelial cell proliferation via  $Met > Jun/Fos$  and cell mobility via  $Met > Stat3$

# 2) Insr / Igfr1 signaling

$Insr$   
 $Igfr1$

$Pi3k > Akt$   
 $mTorC1/2$   
 $FoxO3$   
 $IkK complex$

Integrin- and growth factor-pathway cross-talk

Laminin 5-mediated epithelial cell-ECM anchorage

Dissassembly of focal adhesions

# 3) Focal adhesion & motility

Adherens junction-signaling

Sensing and cell polarization (Ras1, Rac1, Cdc42)

Tgfb > Smad2/4 signaling

Focal adhesion

Cell-cell adherens junctions

Desmosome

Cell body translocation and retraction

Protrusion of the cell's leading edge

Apicolateral plasma membrane & tight junctions

Cytoskeleton organization

Intracellular vesicle motility

# 4) Cell-cell junctions & cytoskeleton organization
